# Supplementary material for: Outcomes of Scleral Lens in Different Stages and Cone Locations of Keratoconus
Source: Research Square preprint supplement (doi:10.21203/rs.3.rs-7535849/v1), 2025-11-10
Supplement: Supplementary file 1 [file 671de738add40cc6495e1010.docx]

|  | **Before SCL**  **(logMAR)** | **After SCL**  **(logMAR)** | **p value** |
| --- | --- | --- | --- |
| **Mild** | 0.79 ± 0.45 | 0.11 ± 0.10 | 0.000 |
| **Moderate** | 0.95 ± 0.52 | 0.12 ± 0.09 | 0.000 |
| **Advanced** | 1.29 ± 0.63 | 0.24 ± 0.29 | 0.000 |

**Table 3:** Main logMAR visual acuity results with scleral contact lens in mild, moderate and advanced keratoconus

SCL: scleral contact lens
