# Supplementary material for: Outcomes of Scleral Lens in Different Stages and Cone Locations of Keratoconus
Source: Research Square preprint supplement (doi:10.21203/rs.3.rs-7535849/v1), 2025-11-10
Supplement: Supplementary file 2 [file 92909fcc7adb9ff4ac97adab.docx]

|  |  |  |  |  |
| --- | --- | --- | --- | --- |
|  | **Mean** | **SD ±** | **IQR** | **Range** |
| **Age (years)** | 23.71 | 7.44 | 7.06 | 12 ̶ 44 |
| **CDVA (logMAR)** | 0.95 | 0.54 | 0.78 | 0.22 ̶ 3.00 |
| **K1 (D)** | 47.94 | 7.31 | 6.20 | 30.90 ̶ 72.50 |
| **K2 (D)** | 52.52 | 7.22 | 5.30 | 39.10 ̶ 79.30 |
| **Kmax (D)** | 59.12 | 9.33 | 8.90 | 41.60 ̶ 86.30 |
| **TCT (µm)** | 428.27 | 62.54 | 67.0 | 201 ̶ 572 |
| **ACD (mm)** | 3.45 | 0.37 | 0.51 | 2.64 ̶ 4.46 |
| **WTW (mm)** | 11.92 | 0.46 | 0.60 | 9.90 ̶ 12.80 |
| **PD (mm)** | 3.71 | 0.64 | 1.01 | 2.15 ̶ 5.12 |
|  |  |  |  |  |
| **Age Groups** | **< 18 years** | **18-30 years** | **≥ 30 years** |  |
|  | 20% (n=12) | 65% (n=40) | 15% (n=9) |  |
| **Stage Groups** | **Mild** | **Modorate** | **Advanced** |  |
|  | 44% (n=42) | 36% (n=34) | 20% (n=19) |  |
| **Cone Location** | **Inferior** | **Central** | **Paracentral** |  |
|  | 56% (n=53) | 34% (n=32) | 10% (n=10) |  |

**Table 1:** Corneal topography data before scleral contact lens application. Distribution of patients according to stage and cone location.

CDVA: corrected distance visual acuity, KC: Keratoconus, K1: Flat keratometry, K2: Steep keratometry, Kmax: Maximum keratometry, TCT: Thinnest corneal thickness, WTW: White to white, ACD: Anterior chamber depth, PD: Pupil diameter
