# Supplementary material for: Outcomes of Scleral Lens in Different Stages and Cone Locations of Keratoconus
Source: Research Square preprint supplement (doi:10.21203/rs.3.rs-7535849/v1), 2025-11-10
Supplement: Supplementary file 3 [file 9d9886833edb9d831540883f.docx]

| **CDVA Differences** | | | | |
| --- | --- | --- | --- | --- |
|  | **Mild KC** | **Modarate KC** | **Advanced KC** | **All Groups** |
|  | n=42 | n=34 | n=19 | n=95 |
| **Age ***  *r*  *p* | 0.211  0.180 | -0.049  0.781 | 0.272  0.274 | 0.100  0.337 |
| **K1**  *r*  *p* | -0.098  0.538 | 0.060  0.736 | -0.580  0.009 | -0.138  0.183 |
| **K2**  *r*  *p* | 0.059  0.711 | 0.043  0.810 | -0.590  0.008 | -0.113  0.276 |
| **Km**  *r*  *p* | -0.034  0.831 | 0.071  0.688 | -0.624  0.004 | -0.132  0.201 |
| **Kmax**  *r*  *p* | 0.069  0.665 | -0.100  0.574 | -0.521  0.022 | -0.099  0.338 |
| **TCT**  *r*  *p* | 0.041  0.799 | -0.154  0.384 | 0.326  0.174 | 0.049  0.637 |
| **WTW**  *r*  *p* | 0.052  0.756 | 0.085  0.649 | 0.028  0.913 | 0.069  0.525 |
| **ACD***  *r*  *p* | 0.095  0.564 | -0.145  0.413 | -0.698  0.001 | -0.168  0.111 |
| **PD***  *r*  *p* | -0.194  0.236 | -0.145  0.415 | -0.052  0.836 | -0.131  0.216 |

*parametric pearson

**Table-2:** Correlation analysis of CDVA changes with corneal tomographic parameters in different keratoconus stages.

CDVA: corrected distance visual acuity, KC: Keratoconus, K1: Flat keratometry, K2: Steep keratometry, Km: Mean keratometry, Kmax: Maximum keratometry, TCT: Thinnest corneal thickness, WTW: White to white, ACD: Anterior chamber depth, PD: Pupil diameter
