# Supplementary material for: Outcomes of Scleral Lens in Different Stages and Cone Locations of Keratoconus
Source: Research Square preprint supplement (doi:10.21203/rs.3.rs-7535849/v1), 2025-11-10
Supplement: Supplementary file 4 [file cfd583eae4e14b42da4973fe.xlsx]

## Sheet: Sayfa1
PATIENT NUMBER	NAME	AGE	SEX	bilateral	K1	K2	KM	KMAX	TCT	WTW	ACDepth	PupDia	CONE TYPE	CONE LOC	STAGE	VISION_PRE_LENS_SNELLEN	VISION_POT_LENS_SNELLEN	VISION_PRE_LENS_LOG	VISION_POST_LENS_LOG	BİYO	LENS VAULT	LENS R VALUE	LANDING ZONE	LENS_DIAMETER	BASE_CURVE	LENS TYPE	CXL+/-
1	R.A.	15	F	1	43.2	48.7	45.8	55.4	459	12.1	3.28	2.71	OVAL	INFERIOR	MILD	0.4	0.8	0.4	0.1		3.5	13.5	NORMAL	16.5	7.8	MINIMISA A 5	+
	R.A.				45.6	54.6	49.7	61.4	429	12.2	3.3	3.14	OVAL	INFERIOR	MODERATE	0.3	0.7	0.5	0.2		3.75	13.5	NORMAL	16.5	7.8	MINIMISA A9	+
2	Ş.B.	24	F	2	51.1	51.8	51.4	60.5	415	11.8	3.55	4.11	OVAL	INFERIOR	MODERATE	0.1	0.9	1	0.1		4	13.25	WIDE	17	8.3	MINIMISA B22	+
3	H.E.	17	F	2	44.3	47.8	46	48.4	466					PARACENTRAL	MILD	0.2	0.6	0.7	0.222		3.75	13.5	WIDE	17	8.3	MINIMISA	+
4	A.T.	23	F	1	48.8	53.7	51.1	59.3	428	11.5	3.05	2.99	OVAL	INFERIOR	MODERATE	0.03	0.9	1.5	0.1		3.75	13.5	NORMAL	16.5	7.8	MİNİMİS A9	+
	A.T.				44.9	48.6	46.7	52.6	459	11.4	3.03	3.11	OVAL	INFERIOR	MILD	0.15	0.8	1	0.1		3.75	13.5	NORMAL	16.5	7.8	MINIMISA A5	+
5	G.V.	20	F	1	57.3	59.4	58.3	68.4	324	12.6	3.78	4.77	ROUND	CENTRAL	ADVENCED	0.1	0.8	1	0.1		3.75	13.25	WIDE	17	8.3	MINIMISA B14	+
	G.V.				50.9	52.8	51.8	55.8	334	12.6	3.68	4.53	ROUND	INFERIOR	MODERATE	0.2	0.9	0.699	0.1		3.75	13.25	WIDE	17	8.3	MİNMİSA B14	+
6	B.Ç	25	M	1	40.3	43.8	42	46.2	435	11.8	3.37	4.36	OVAL	INFERIOR	MILD	0.7	1	0.222	0		3.5	13.5	WIDE	17	8.3	MINIMISA	+
	B.Ç.				47.5	53.2	50.2	58.7	390	12.7	3.6	4.05	OVAL	INFERIOR	MODERATE	0.05	1	1.301	0		3.75	13.5	WIDE	17	8.3	MINIMISA	+
7	İ.H.Y	19	M	2	43.1	49	45.9	51.3	492	12.1	3.24	3.86	OVAL	INFERIOR	MILD	0.2	1	0.699	0		3	17	WIDE	17	8.3	MINIMISA	+
8	Y.S.	18	F	2	48.4	53.3	50.7	64.6	399	12.3	3.86	4.34	OVAL	INFERIOR	MODERATE	0.2	0.9	0.699	0.1	-	3.75	13.5	NORMAL	16.5	7.8	MINIMISA	+
9	F.A.	31	F	1	50.3	61.1	55.2	74.1	429	12.3	3.65	2.91	OVAL	INFERIOR	ADVENCED	0.3	0.8	0.523	0.1		4	13.5	WIDE	17	8.3	MINIMISA	+
	F.A.				43.8	49.5	46.5	58.8	496	12.2	3.35	2.7	OVAL	INFERIOR	MILD	0.4	0.9	0.398	0.1		4	13.5	NORMAL	16.5	7.8	MINIMISA	-
10	S.N.A	25	F	2	66.9	70.7	68.7	74.9	368	11.3	3.81	4.34	GLOBUS	CENTRAL	ADVENCED	0.1	0.6	1	0.222	VOGT	4.75	17	WIDE	17	7.8	MINIMISA	+
11	N.B.	15	F	1	49	54.4	51.5	60.4	454	11.5	3.37	4.04	ROUND	CENTRAL	MODERATE	0.2	0.9	0.699	0.1		3.5	13.5	NORMAL	16.5	7.8	MINIMISA A5	+
	N.B.				47.3	50.6	48.9	53.6	471		3.34	3.77	ROUND	CENTRAL	MODERATE	0.1	0.9	1	0.1		3.75	13.5	WIDE	17	8.3	MINIMISA B14	+
12	A.S.	27	F	2	49.8	52	50.9	57.6	432	11.1	3.28	3.16	OVAL	INFERIOR	MODERATE	0.2	0.4	0.699	0.398		3.75	13.5	WIDE	17	7.8	MINIMISA	+
13	M.A.	30	M	1	40.2	45.3	42.6	53.4	538	11.8	3.16	3.21	GLOBUS	PARACENTRAL	MILD	0.2	1	0.699	0	SCAR	3.75	13.5	WIDE	17	8.3	MINIMISA B14	+
	M.A.				44.4	52.7	48.2	50.6	489		3.4	2.79	GLOBUS	PARACENTRAL	MODERATE	0.05	1	1.301	0	SCAR	4	13.5	WIDE	17	8.3	MINIMISA B18	+
14	A.K.	24	M	1	42.7	43	42.8	49.6	455	11.8	3.35	3.82	OVAL	INFERIOR	MILD	0.2	0.7	0.699	0		3.5	13.25	WIDE	17	8.3	MINIMISA	+
	A.K.				55.1	55.3	55.2	70.5	399	11.7	3.66	4.1	ROUND	CENTRAL	ADVENCED	0.03	0.8	1.5	0.2		3.75	13.5	WIDE	17	8.3	MINIMISA	+
15	B.B.A.	12	M	1	58.8	62.1	60.4	77.9	407	11.8	4.1	4.1	ROUND	CENTRAL	ADVENCED	0.05	0.5	1.301	0.301		3.75	13.5	WIDE	17	8.3	MINIMISA	+
	B.B.A.				46	51.2	48.4	61	513	12	3.72	3.84	ROUND	CENTRAL	MODERATE	0.15	0.9	1	0.1		3.5	13.5	WIDE	17	8.3	MINIMISA	+
16	V.K.	26	M	1	41.5	48.5	44.7	56.4	455	12.3	2.71	4.19	OVAL	INFERIOR	MILD	0.3	0.7	0.523	0.2	SCAR	4.5	13.5	WIDE	17	7.8	MINIMISA A18	+
	V.K.				69.6	74	71.8	86.3	347	12.3	3.31	4.14	OVAL	INFERIOR	ADVENCED	0.02	0.7	1.7	0.2	SCAR	4.75	13.5	WIDE	17	7.8	MINIMISA B26	+
17	Z.Y.	16	F	2	66.3	67	66.7	75.6	352	11.8	4.46	3.78	ROUND	CENTRAL	ADVENCED	0.3	0.5	0.523	0.301	SCAR	4.25		WIDE	17	7.8	MINIMISA A 17	+
18	S.E.H.	25	M	1	56	65.7	60.5	77.4	405	11.2	3.49	3.76	ROUND	CENTRAL	ADVENCED	0.05	0.5	1.301	0.301		4	13.25	NORMAL	16.5	7.8	MINIMISA A13	+
	S.E.H.				67.7	79.3	73.1	83.8	313	11.3	3.79	3.87	ROUND	CENTRAL	ADVENCED	0.05	0.4	1.301	0.398		4.25	13.5	NORMAL	16.5	7.8	MINIMISA A17	+
19	Ö.S.	31	F	1	44.5	46.9	45.7	50.1	504	12.4	3.65	4.41	OVAL	INFERIOR	MILD	0.4	0.7	0.398	0.2		3.75	13.5	WIDE	17	8.3	MINIMISAB14	+
	Ö.S.				46.9	50.8	48.8	56.5	471	12.2	3.72	4.18	OVAL	INFERIOR	MODERATE	0.5	0.7	0.301	0.2		4	13.5	WIDE	17	8.3	MINIMISA B11	+
20	M.G.	25	M	2	46.9	50.2	48.5	56.2	348	12	3.3	3.94	ROUND	CENTRAL	MODERATE	0.1	0.9	1	0.1		3.5	13.5	WIDE	17	8.3	MINIMISA B10	+
21	E.Ö.	30	F	2	39	44.4	41.5	44.4	572	12.8	3.07	2.72	ROUND	CENTRAL	MILD	0.1	0.9	1	0.1		3.75	13.5	WIDE	17	7.8	MINIMISA A9	+
22	A.K.	17	F	2	47.3	53	50	56.5	439	12.4	3.91	3.39	OVAL	INFERIOR	MODERATE	0.2	0.6	0.699	0.222	SCAR	4	13.5	WIDE	17	8.3	MINIMISAB18	+
23	F.D.	22	F	2	47.7	52.1	49.8	57.4	471	11.1	2.94	2.4	ROUND	CENTRAL	MODERATE	0.2	1	0.699	0		3.75	13.5	NORMAL	16.5	7.8	MINIMISA A9	+
24	O.İ.	16	M	1	42.5	51.8	46.7	56.9	219	12.5	4.05	3.42	GLOBUS	CENTRAL	MILD	0.03	0.9	1.5	0.1	SCAR	4.25	13.5	NORMAL	16.5	7.8	MINIMISA A17	+
	O.İ.				42.1	50.8	46.1	58	201	12.3	4.01	2.97	GLOBUS	CENTRAL	MILD	0.03	0.5	1.5	0.3	SCAR	4	13.5	NORMAL	16.5	7.8	MINIMISA A13	+
25	M.B.	25	M	1	45.9	51.2	48.4	56.8	465	12.2	3.89	5.12	OVAL	INFERIOR	MODERATE	0.05	0.5	1.301	0.301		4	13.5	WIDE	17	8.3	MINIMISAB18	+
	M.B.				43.7	48.1	45.8	51.4	505	12.3	3.74	4.41	OVAL	INFERIOR	MILD	0.05	0.8	1.301	0.1		3.75	13.5	WIDE	17	8.3	MINIMISA B14	+
26	H.B.	26	F	1	47.3	49.9	48.6	55.5	439		3.18	5.09	OVAL	INFERIOR	MODERATE	0.3	0.9	0.523	0.1		4	13.5	WIDE	17	8.3	MINIMISA B18	+
	H.B.				38.5	39.1	38.8	41.6	465	12.3	3.17	4.46	OVAL	INFERIOR	MILD	0.3	0.9	0.523	0.1		3.75	13.5	WIDE	17	8.3	MINIMISA B14	+
27	N.E.	25	F	1	46.1	48.6	47.3	53	436	11.6	3.24	3.68	OVAL	INFERIOR	MILD	0.2	0.8	0.699	0.1		3.75	13.5	WIDE	17	8.3	MINIMISA B14	+
	N.E.				49.2	51.8	50.5	56.8	419	11.7	3.25	3.77	OVAL	INFERIOR	MODERATE	0.2	0.9	0.699	0.1		3.75	13.5	WIDE	17	8.3	MINIMISA B14	+
28	E.A.	25	M	1	43.8	46.5	45.1	48.2	345	11.6	3.15	3.75	OVAL	CENTRAL	MILD	0.6	1	0.222	0		3.75		WIDE	17	7.8	MINIMISA A9	+
	E.A.				42.7	44.6	43.7	47.1	351	11.6	3.06	3.8		PARACENTRAL	MILD	0.6	1	0.222	0		3.5		WIDE	17	7.8	MINIMISA A5	+
29	H.K.	26	F	1	50.3	51.8	51	58.1	397	12.3	3.59	4.22	ROUND	INFERIOR	MODERATE	0.03	1	1.5	0		3.75	13.5	WIDE	17	8.3	MINIMISA	+
	H.K.				43.4	44.7	44.8	48.2	423		3.47	3.71	OVAL	INFERIOR	MILD	0.2	1	0.699	0		3.5	13.5	WIDE	17	8.3	MINIMISA	+
30	H.K.	40	M	2	40.9	47.5	44	60.2	412	11.8	3.59	3.08	OVAL	INFERIOR	MILD	0.03	0.9	1.5	0.1	PMD	4	13.25	WIDE	17	8.3	MINIMISA	+
31	Z.E.	21	F	1	51.7	58.3	54.8	65	396	11	3.19	3.14	ROUND	CENTRAL	ADVENCED	0.15	0.8	1	0.1	HAZE 1	3.5	13.5	NORMAL	16.5	7.8	MINIMISA	+
	Z.E.				47.5	54.8	50.9	63.2	438	10.8	3.31	3.49	ROUND	CENTRAL	ADVENCED	0.3	0.9	0.523	0.1	HAZE 1	3.5	13.5	NORMAL	16.5	7.8	MINIMISA	+
32	H.S.P.	20	M	2	50	52.3	51.1	59	528	12.6	3.51	5	OVAL	INFERIOR	MODERATE	0.1	0.7	1	0.2		4	13.5	NORMAL	16.5	7.8	MINIMISA	+
33	M.D.	20	M	1	44.9	50.7	47.7	55.6	457	12	3.64	4.45	GLOBUS	CENTRAL	MILD	0.05	0.7	1.301	0.2		3.75	13.5	NORMAL	16.5	7.8	MINIMISA	+
	M.D.				45.9	51.3	48.5	55.3	449	12	3.64	3.68	GLOBUS	CENTRAL	MODERATE	0.05	0.7	1.301	0.2		3.75	13.5	NORMAL	16.5	7.8	MINIMISA	+
34	G.A.	26	F	1	43	46.7	44.8	47.8	466	12.1	3.36	4.08	OVAL	CENTRAL	MILD	0.4	1	0.398	0		3.5	13.5	NORMAL	16.5	7.8	MINIMISA	+
	G.A.				42.7	45.8	44.2	47	483	12.2	3.41	3.52	OVAL	CENTRAL	MILD	0.5	0.9	0.301	0.1		3.5	13.5	NORMAL	16.5	7.8	MINIMISA	+
35	M.T.	27	M	2	45	52	48.3	55.6	439	11.5	2.75	3.1	OVAL	INFERIOR	MODERATE	0.4	0.9	0.398	0.1		3.75	13.25	WIDE	17	8.3	MINIMISA	+
36	F.Y.	17	F	2	46.8	49.1	47.9	53.1	503	11.2	3.33	3.94	OVAL	INFERIOR	MILD	0.1	0.9	1	0.1		3.75	13.5	NORMAL	16.5	7.8	MINIMISA A9	+
37	M.F.K.A	34	M	1	43	50.2	46.3	59.8	472	11.7	3.12	2.96	OVAL	INFERIOR	MILD	0.4	0.7	0.398	0.2		3.75	13.5	WIDE	17	8.3	MINIMISA B14	+
	M.F.K.A				40.1	45.8	42.8	54.9	450	11.9	3.11	3.16	OVAL	INFERIOR	MILD	0.4	0.5	0.398	0.301		3.75	13.5	WIDE	17	8.3	MINIMISA B14	+
38	M.İ.	37	M	2	72.5	74	73.3	83.3	352	12.1	4.32	3.51	ROUND	CENTRAL	ADVENCED	0.001	0.1	3	1		4.75		WIDE	17	8.3	MINIMISA B26	+
39	G.T.	20	F	2	48.6	52.5	50.5	57.7	414	12	3.32	3.78	OVAL	INFERIOR	MODERATE	0.05	0.7	1.301	0.2		4	13.5	NORMAL	16.5	7.8	MINIMISA A13	+
40	H.Y.	18	M	2	57.2	65.1	60.9	72.2	339	12	4.15	3.28	ROUND	CENTRAL	ADVENCED	0.01	0.7	2	0.2		4.25	13.5	NORMAL	16.5	7.8	MINIMISA A17	+
41	C.A.	21	F	1	47.5	52.8	50	63.4	435	12	3.72	3.36	OVAL	INFERIOR	MODERATE	0.02	0.6	1.7	0.222		3.75	13.5	NORMAK	16.5	7.8	MINIMISA	+
	C.A.				47	48.1	47.5	57.3	462	11.8	3.64	3.37	OVAL	INFERIOR	MILD	0.02	0.5	1.7	0.3		3.75	13.5	NORMAL	16.5	7.8	MINIMISA	+
42	Y.C.G.	17	M	1	50	50.1	50	54.3	418	12.1	3.19	3.52	OVAL	INFERIOR	MODERATE	0.2	1	0.699	0		3.75	13.5	WIDE	17	7.8	MINIMISA A10	+
	Y.C.G.	17			48.9	49.6	49.3	59.5	422	12.1	3.07	3.29	OVAL	INFERIOR	MODERATE	0.4	0.9	0.398	0.1		3.75	13.5	NORMAL	16.5	7.8	MINIMISA A9	+
43	B.B.	22	F	1	48.6	53.3	50.8	57.8	471	11.8	3.46	4.23	ROUND	CENTRAL	MODERATE	0.3	0.8	0.523	0.1		3.75	13.5	NORMAL	16.5	7.8	MINIMISA A9	+
	B.B.				45.6	50.4	47.9	53	487	12	3.34	4.65	ROUND	CENTRAL	MILD	0.3	1	0.523	0		4	13.5	NORMAK	16.5	7.8	MINIMISA A13	+
44	G.B.	25	F	2	43.4	60.5	50.6	71.5	490	11.3	2.7	4.24	GLOBUS	PARACENTRAL	MODERATE	0.001	0.7	3	0.2		3.75	13.5	WIDE	17	7.8	MINIMISA A10	+
45	H.E.A.	32	M	2	50.1	59.1	54.2	61.4	409					PARACENTRAL	ADVENCED	0.01	0.7	2	0.2		4	13.5	WIDE	17	8.3	MINIMISA B18	+
46	İ.Y	43	M	1	45	51.2	47.9	53.6	402	12	3.51	3.2	ROUND	CENTRAL	MILD	0.1	1	1	0		3.75	13.5	NORMAL	16.5	7.8	MINIMISA A9	+
	İ.Y.	43			44.1	49.5	46.6	52.2	436	12.1	3.5	3.23	ROUND	CENTRAL	MILD	0.1	1	1	0		3.75	13.5	NORMAL	16.5	7.8	MINIMISA A9	+
47	Y.B.	44	M	1	30.9	43.6	36.2	55.5	492	12.2	2.66	2.15	GLOBUS	PARACENTRAL	MILD	0.15	0.9	1	0.1		3.75	13.25	WIDE	17	7.8	MINIMISA A10	+
	Y.B.	44			31	40.3	35	50.8	524	12.1	2.64	2.55	GLOBUS	PARACENTRAL	MILD	0.1	0.8	1	0.1		3.75	13.25	WIDE	17	7.8	MINIMISA A9	+
48	H.D.	32	F	1	44.5	46.9	45.7	51.7	411					PARACENTRAL	MILD	0.01	0.5	2	0.3		3.5	13.5	NORMAL	16.5	7.8	MINIMISA A5	+
	H.D.	32			43.6	43.8	43.7	49.8	339					PARACENTRAL	MILD	0.02	0.5	1.7	0.3		3.5	13.5	NORMAL	16.5	7.8	MINIMISA B10	+
49	D.K.	16	F	1	43.9	50.3	46.8	52.1	459	12.4	3.19	3.44	ROUND	CENTRAL	MILD	0.1	0.6	1	0.2		3.75	13.25	NORMAL	16.5	7.8	MINIMISA A 9	+
	D.K.	16			42.8	50.8	46.4	53.2	435	12.4	3.32	4.24	ROUND	CENTRAL	MILD	0.2	0.5	0.699	0.3	SCAR	3.75	13.25	NORMAL	16.5	7.8	MINIMISA A9	+
50	R.B.	23	F	2	44.4	46	45.2	50.7	493	9.9	2.78	4	OVAL	INFERIOR	MILD	0.3	0.9	0.523	0.1		3.75	13.5	WIDE	17	8.3	MINIMISA B14	+
51	H.D.	19	F	2	44.3	47.8	46	48.4	466	11.5	3.38	3.55	ROUND	CENTRAL	MILD	0.4	0.6	0.398	0.222	SCAR	3.75	13.5	NORMAL	16.5	7.8	MINIMISA	+
52	F.Y.	22	M	2	44	48	45.9	51	472	12.5	4.01	3.95	OVAL	INFERIOR	MILD	0.2	0.8	0.699	0.1		3.5	13.5	WIDE	17	8.3	MINIMISA B14	+
53	Y.B.	19	M	2	63.4	66	64.7	81.4	332	12.4	3.98	3.91	ROUND	CENTRAL	ADVENCED	0.2	0.7	0.699	0.2		4	13.5	WIDE	17	8.3	MINIMISA B18	+
54	M.H.	18	M	1	55.1	59.4	57.2	76	413	12	3.54	4.49	ROUND	CENTRAL	ADVENCED	0.05	0.7	1.301	0.2		3.75	13.5	WIDE	17	8.3	MINIMISA B14	+
	M.H.	18			49.3	50.9	50.1	62	443	12.1	3.46	4.32	ROUND	CENTRAL	MODERATE	0.15	0.6	1	0.222		3.5	13.5	WIDE	17	8.3	MINIMISA B10	+
55	A.K.	12	F	1	57.6	60.8	59.2	70.2	386	11.8	3.7	3.9	ROUND	CENTRAL	ADVENCED	0.05	0.7	1.301	0.2		4	13.5	NORMAL	16.5	7.8	MINIMISA 13	+
	A.K.	12			44.1	46.7	45.4	49.4	432	11.7	3.34	3.47	ROUND	CENTRAL	MILD	0.4	1	0.523	0		4	13.5	NORMAL	16.5	7.8	MINIMISA A5	+
56	G.K.	20	F	2	51.1	53.4	52.2	62.5	404	11.5	3.23	2.56	ROUND	INFERIOR	MODERATE	0.3	1	0.3	0	PMD	3.75	13.25	WIDE	17	7.8	MINIMISA A10	+
57	Z.A.	30	F	2	45.8	48.9	47.3	54.4	398	11.9	3.5	3.34	ROUND	CENTRAL	MILD	0.2	0.9	0.699	0.1		3.5	13.25	NORMAL	16.5	7.8	MINIMISA A5	+
58	E.T.	23	M	1	44.7	48.8	46.7	54.2	464	12.1	3.65	4.6	OVAL	INFERIOR	MILD	0.5	0.8	0.301	0.1		3.75	13.25	NORMAL	16.5	7.8	MINIMISA A9	+
	E.T.	23			48.4	52.4	50.3	60.3	435	11.7	3.73	4.87	OVAL	INFERIOR	MODERATE	0.3	0.7	0.523	0.2		3.75	13.25	NORMAL	16.5	7.8	MINIMISA A9	+
59	A.E.H.	22	M	1	49	53.9	51.3	58.7	366	12.4	4.02	3.3	OVAL	INFERIOR	MODERATE	0.05	0.7	1.301	0.2		4.25	13.5	NORMAL	16.5	7.8	MINIMISA A17	+
	A.E.H.	22			51.2	54	56	61.3	369	12.3	3.91	4.63	OVAL	INFERIOR	ADVENCED	0.01	0.5	2	0.301		4.25	13.5	WIDE	17	8.3	MINIMISA B22	+
60	E.A.	13	F	2	46.4	50.2	48.3	58	479	12.2	3.66	4.34	OVAL	INFERIOR	MODERATE	0.2	1	0.699	0		3.5	13.5	NORMAL	16.5	7.8	MINIMISA A5	+
61	A.K.	31	F	1	53.1	55.2	54.2	63.7	420	11.8	3.02	2.66	ROUND	CENTRAL	ADVENCED	0.05	0.9	0.699	0.1		3.75	13.5	WIDE	17	7.8	MINIMISA A 10	+
	A.K.	31			49.3	51.3	50.2	56.8	422	11.7	2.98	2.91	ROUND	CENTRAL	MODERATE	0.05	0.8	1.301	0.1		3.75	13.5	NORMAL	16.5	7.8	MINIMISA A9	+
